# Supplementary material for: Chitosan Glutaraldegyde Cryogels for Wastewater Treatment and Extraction of Silver Nanoparticles
Source: MDPI journal article supplement (doi:10.3390/pr11061661), 2023-05-30
Supplement: s1 [file s1]

Archive with 1 entries (1 files):
- processes-2391861-supplementary.pdf
