# Supplementary material for: Chitosan Glutaraldegyde Cryogels for Wastewater Treatment and Extraction of Silver Nanoparticles
Source: MDPI journal article supplement (doi:10.3390/pr11061661), 2023-05-30
Supplement: s1 [file s1 › processes-2391861-supplementary.pdf]

## Supplementary information

# Chitosan glutaraldehyde cryogels for wastewaters treatment and extraction of silver nanoparticles

Dmitriy Berillo <sup>1,2,3\*</sup> and Aknazar Arysbeke <sup>3,4</sup>

<sup>1</sup> School of Applied Sciences, University of Brighton, Huxley Building, Lewes Road, Brighton BN2 4GJ, United Kingdom.

<sup>2</sup> Department of chemistry and chemical engineering, Institute of Chemical and Biological Technologies (IHBT), Satbayev University Almaty 050013, Kazakhstan

<sup>3</sup> Department of pharmaceutical and toxicological chemistry, pharmacognosy and botany, Asfendiyarov Kazakh National Medical University, 050000 Almaty, Republic of Kazakhstan.

<sup>4</sup> Tufts University, 419 Boston Ave, Medford, MA 02155, USA [Aknazar.Arysbeke@tufts.edu](mailto:Aknazar.Arysbeke@tufts.edu)

\* Correspondence: e-mail: [d.berillo@satbayev.university](mailto:d.berillo@satbayev.university)

## Methods

### AgNPs Synthesis

Ethanol (70%) tincture of flowers *Calendula off.* production LLP "Pharmacy 2010", Kazakhstan, Karaganda; silver nitrate 99 % and aqueous solution of ammonia (25 %) LabChemProm(Almaty, Kazakhstan) were used without preliminary treatment. AgNPs were synthesized according to previously reported method with some modifications[1]. A solution of 1 mM silver nitrate was mixed with the ethanol (70%) plant extract of *Calendula off.* flowers, diluted with purified water in a ratio of 1:50. The plant extract was used as a stabilizer and reducing agent. The final concentration of the reaction mixture was: 1% alcohol tincture of *Calendula off.* and 0.008% silver nitrate and the pH was adjusted to 9 by ammonia solution. Then that reaction mixture was left under sunlight for approximately 48h and the obtained AgNPs suspension was stored at + 4 °C.

### Characterization of physical properties of cryogels

Physical properties of the cryogels were evaluated using the following equations.

Swelling ratio:

$$SR = \frac{W_t}{W_d} \times 100\% \quad \text{eq.S1}$$

Water uptake:

$$WU = \frac{(W_t - W_d)}{W_d} \times 100 \quad \text{eq.S2}$$

Porosity:

$$P = \left(1 - \frac{d_0}{d_3}\right) \times 100 \quad \text{eq.S3}$$

- Where  $W_t$  and  $W_d$  represent the weights of the hydrogel in swollen state at time  $t$ , and respectively in dried state;
- $W_e$  is the weight of swollen hydrogel at equilibrium;
- $d_0$  is the density of the dried cross-linked polymer and  $d_3$  is the density of the equilibrium swollen cross-linked polymer.

## Results

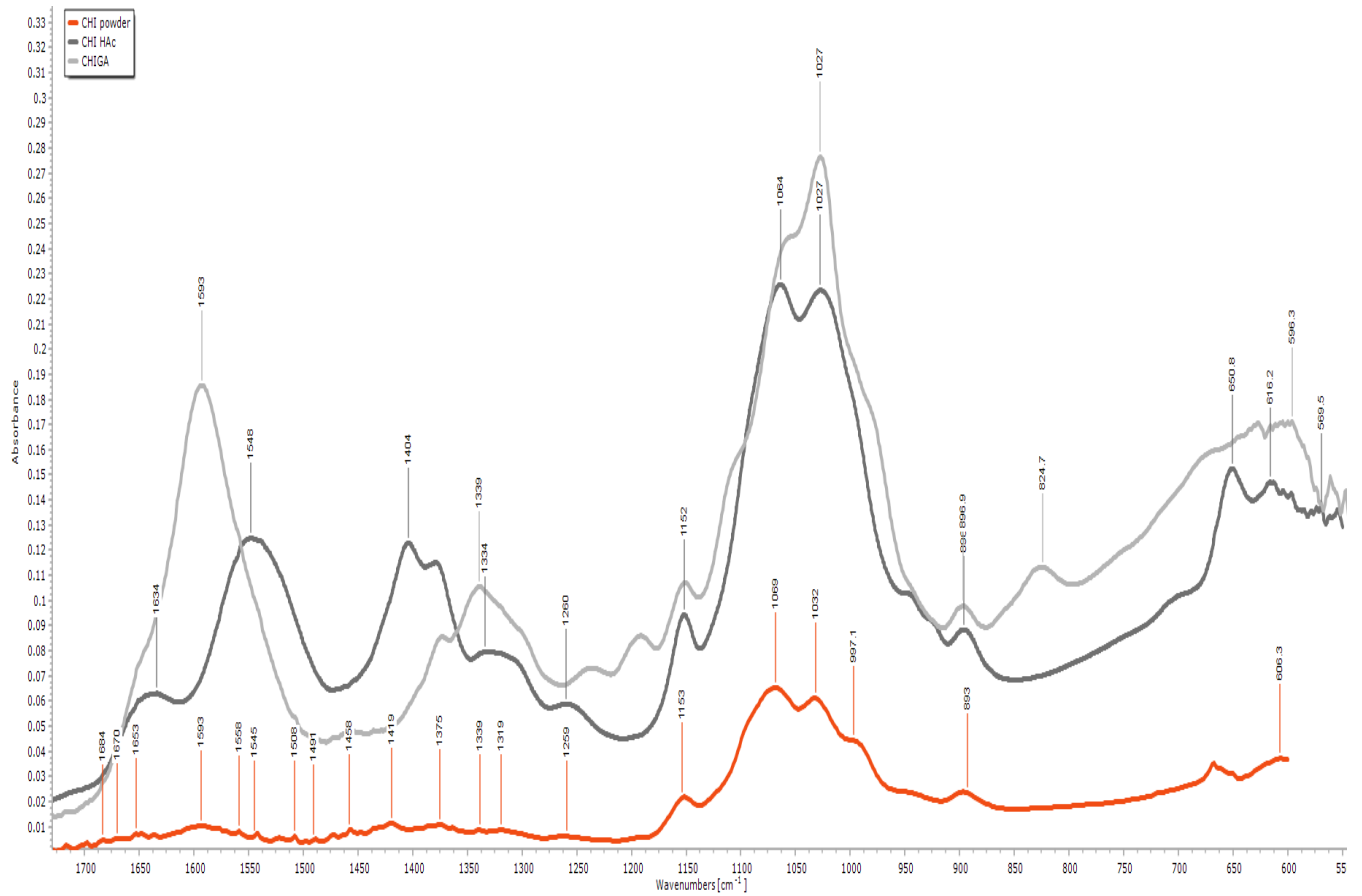

**Figure S1** FTIR spectra of dry samples of: CHI in native state, freeze dried CHI dissolved in acetic acid and cryogel CHI-GA.

|                            |                                                 |
|----------------------------|-------------------------------------------------|
| Record Number: 1           | Dispersant RI: 1,330                            |
| Material RI: 0,54          | Viscosity (cP): 0,8872                          |
| Material Absorbance: 1,350 | Measurement Date and Time: 14 января 2021 г. 15 |

|                                             |                                 |
|---------------------------------------------|---------------------------------|
| Temperature (°C): 24,9                      | Duration Used (s): 25           |
| Count Rate (kcps): 254,8                    | Measurement Position (mm): 4,65 |
| Cell Description: Disposable sizing cuvette | Attenuator: 8                   |

|                                | Size (r.nm):         | % Number | Width (r.nm): |
|--------------------------------|----------------------|----------|---------------|
| <b>Z-Average (r.nm): 64,00</b> | <b>Peak 1: 47,94</b> | 100,0    | 16,38         |
| <b>Pdl: 0,098</b>              | <b>Peak 2: 0,000</b> | 0,0      | 0,000         |
| <b>Intercept: 0,959</b>        | <b>Peak 3: 0,000</b> | 0,0      | 0,000         |

Result quality : **Good**

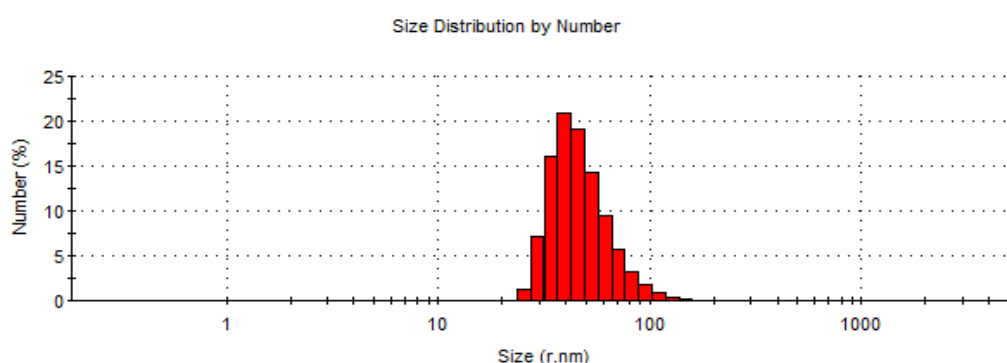

|                                           |                                      |
|-------------------------------------------|--------------------------------------|
| Record Number: 19                         | Dispersant RI: 1,330                 |
| Date and Time: 14 января 2021 г. 16:22:43 | Viscosity (cP): 0,8872               |
|                                           | Dispersant Dielectric Constant: 78,5 |

|                                 |                                 |
|---------------------------------|---------------------------------|
| Temperature (°C): 25,1          | Zeta Runs: 20                   |
| Count Rate (kcps): 173,6        | Measurement Position (mm): 4,50 |
| Cell Description: Zeta dip cell | Attenuator: 10                  |

|                                    | Mean (mV)            | Area (%) | Width (mV) |
|------------------------------------|----------------------|----------|------------|
| <b>Zeta Potential (mV): -36,4</b>  | <b>Peak 1: -36,4</b> | 100,0    | 17,1       |
| <b>Zeta Deviation (mV): 17,1</b>   | <b>Peak 2: 0,00</b>  | 0,0      | 0,00       |
| <b>Conductivity (mS/cm): 0,118</b> | <b>Peak 3: 0,00</b>  | 0,0      | 0,00       |

Result quality : **Good**

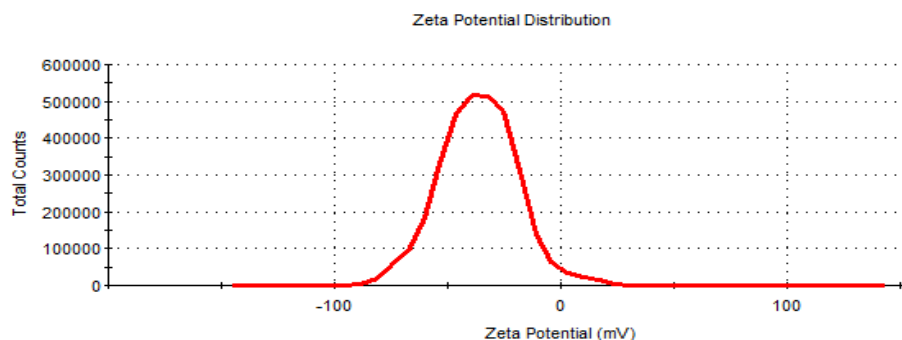

**Figure S1.** A) Histogram of size distribution of AgNPs stabilized by the *Calendula off flower* extract. B) Zeta potential of AgNPs stabilized by the *Calendula off flower* extract.

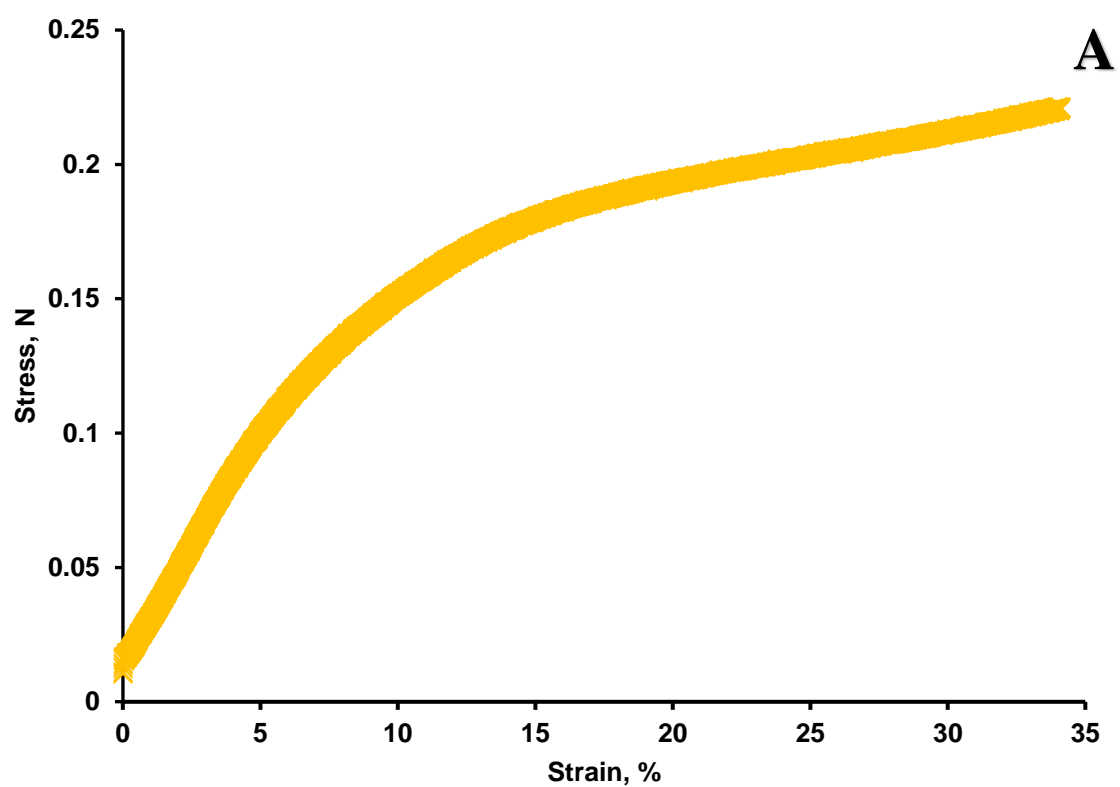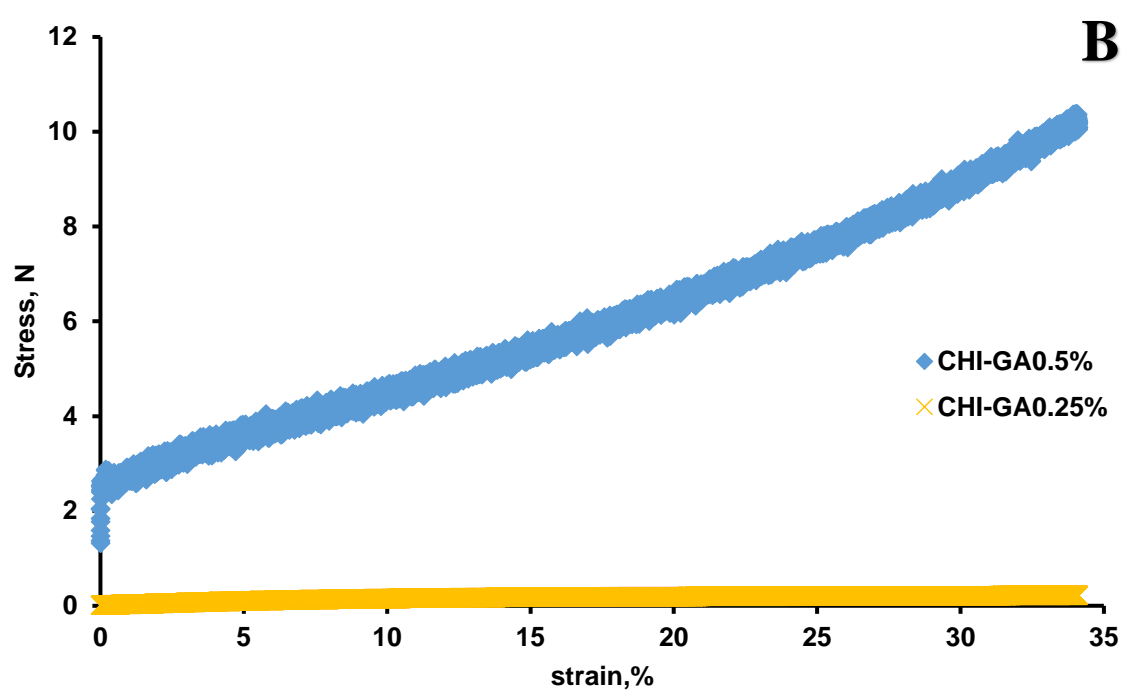

**Figure S3.** Compression test of cryogels, average data, n=4: A) CHI-GA 0.25%; B) comparison CHI-GA 0.5% and CHI-GA 0.25%;

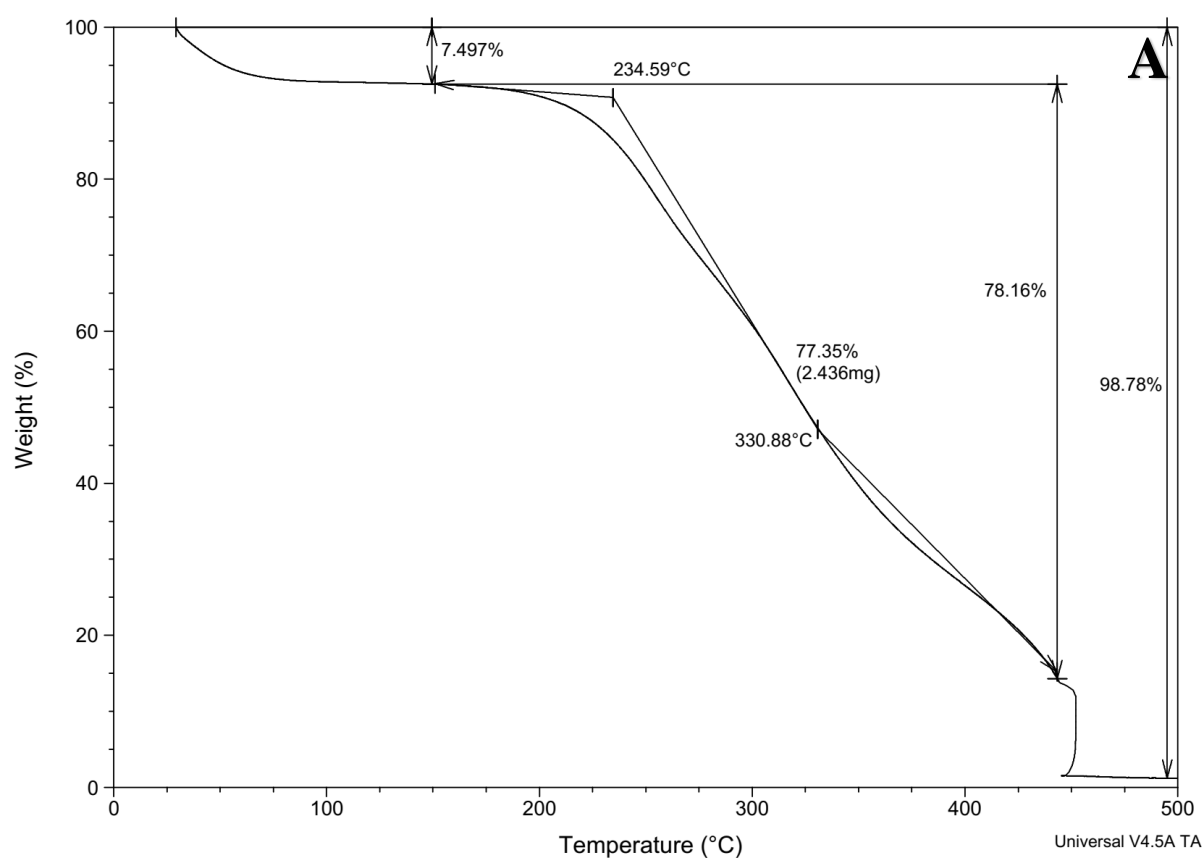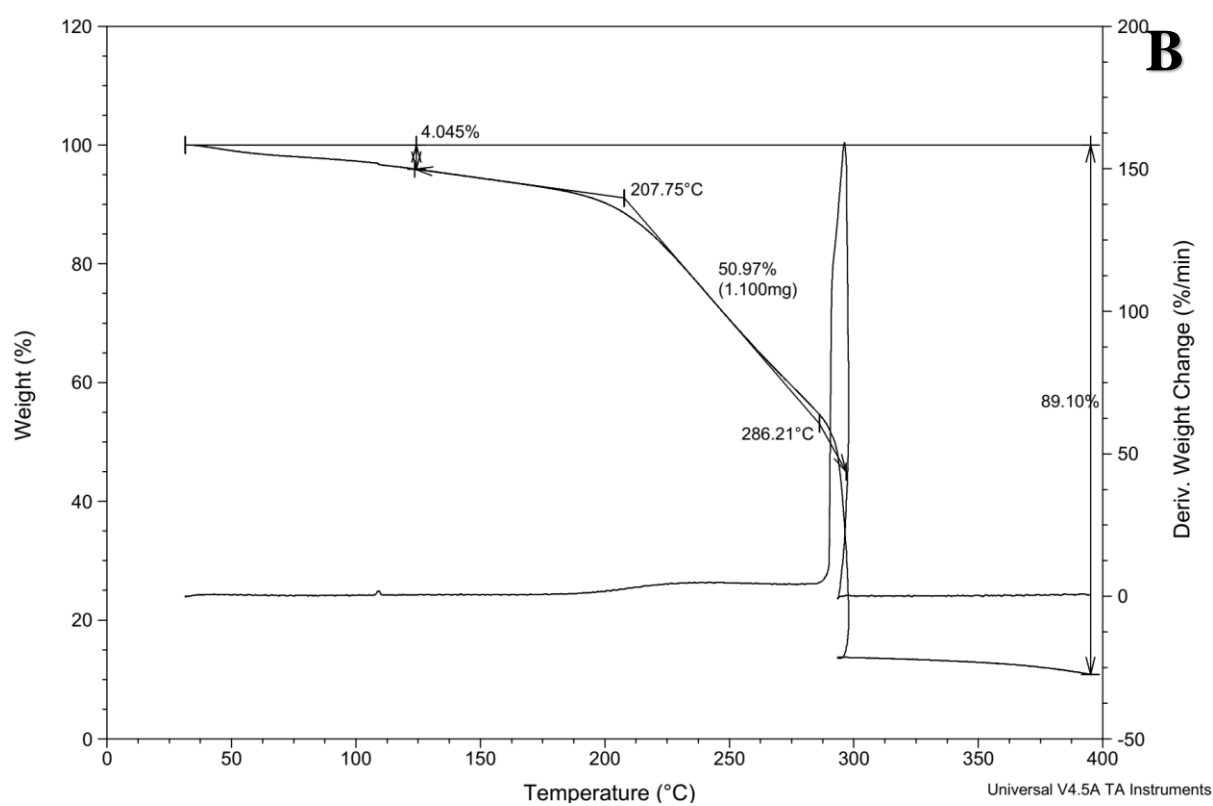

**Figure S4.** TGA of freeze dried cryogels in an atmosphere of air: a) CHI-GA; CHI-GA reduced by  $\text{NaBH}_4$ .

Comment: CHI 2% HAc freeze dried

Instrument: DSC Q2000 V24.11 Build 124

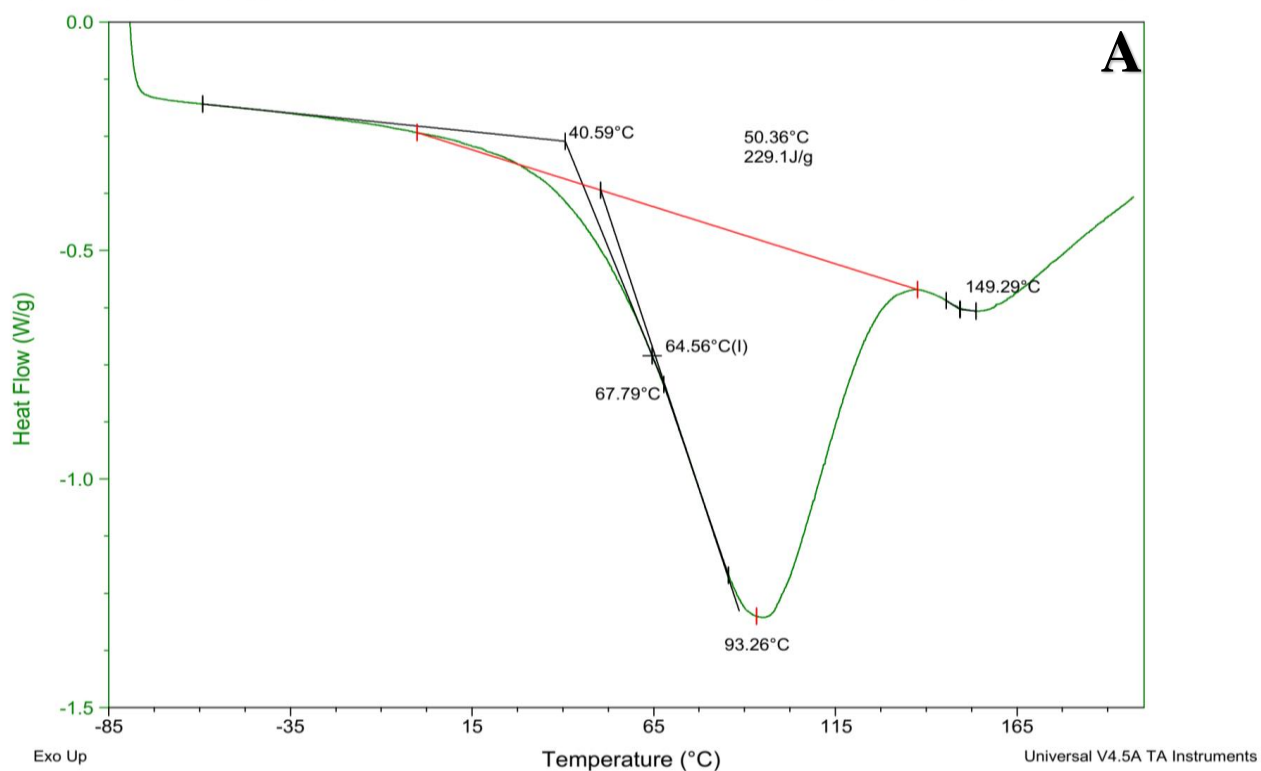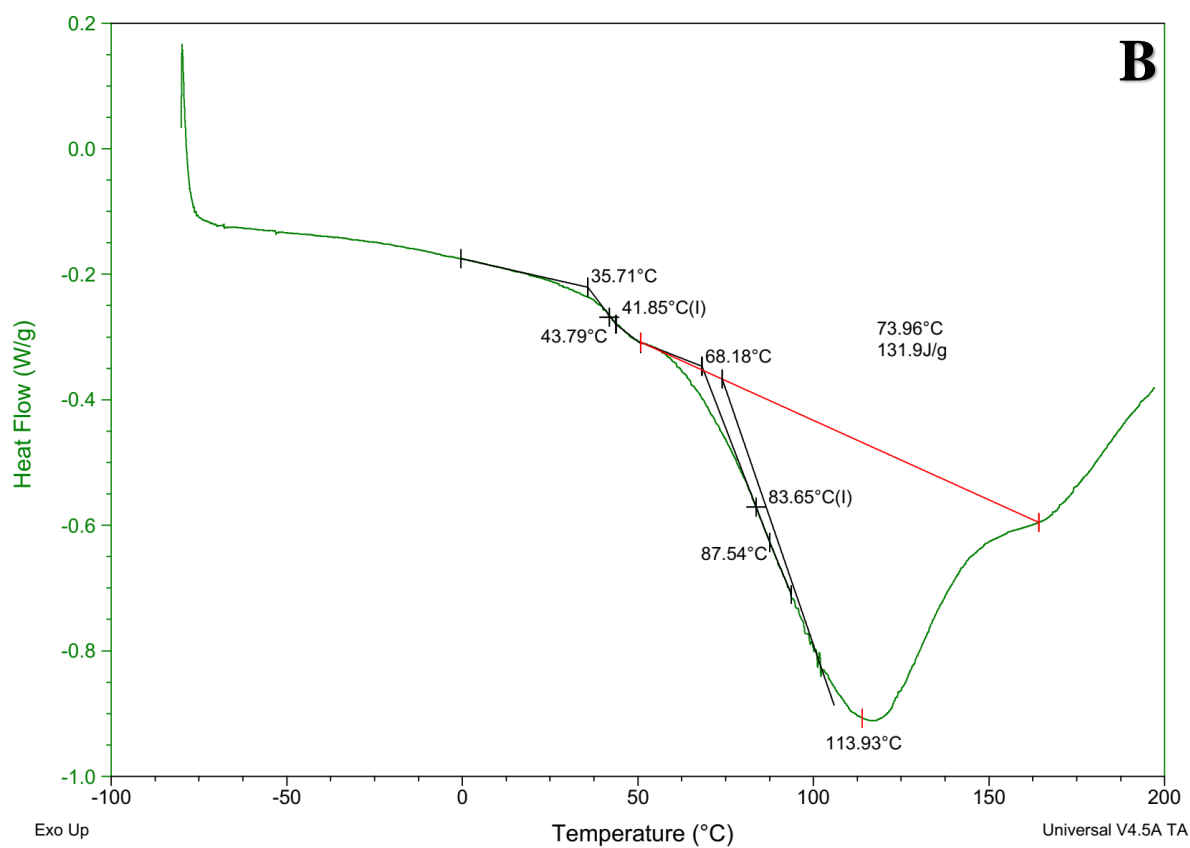

**Figure S5** DSC diagram of freeze dried samples: A) solution of CHI\*HAc B) cryogel CHI-GA.

Sample Desc: CHI GA contr  
Outgas Time: 3.0 hrs  
Analysis gas: Nitrogen  
Analysis Time: 419.0 min

Comment:  
Outgas Temp: 100.0 °C  
Molec. Wt: 28.0134 g  
Instrument: Autosorb Station 1

Sample Weight: 0.0505 g  
Non-Ideality: 6.58e-05 1/Torr  
Bath temp.: 77.3 K

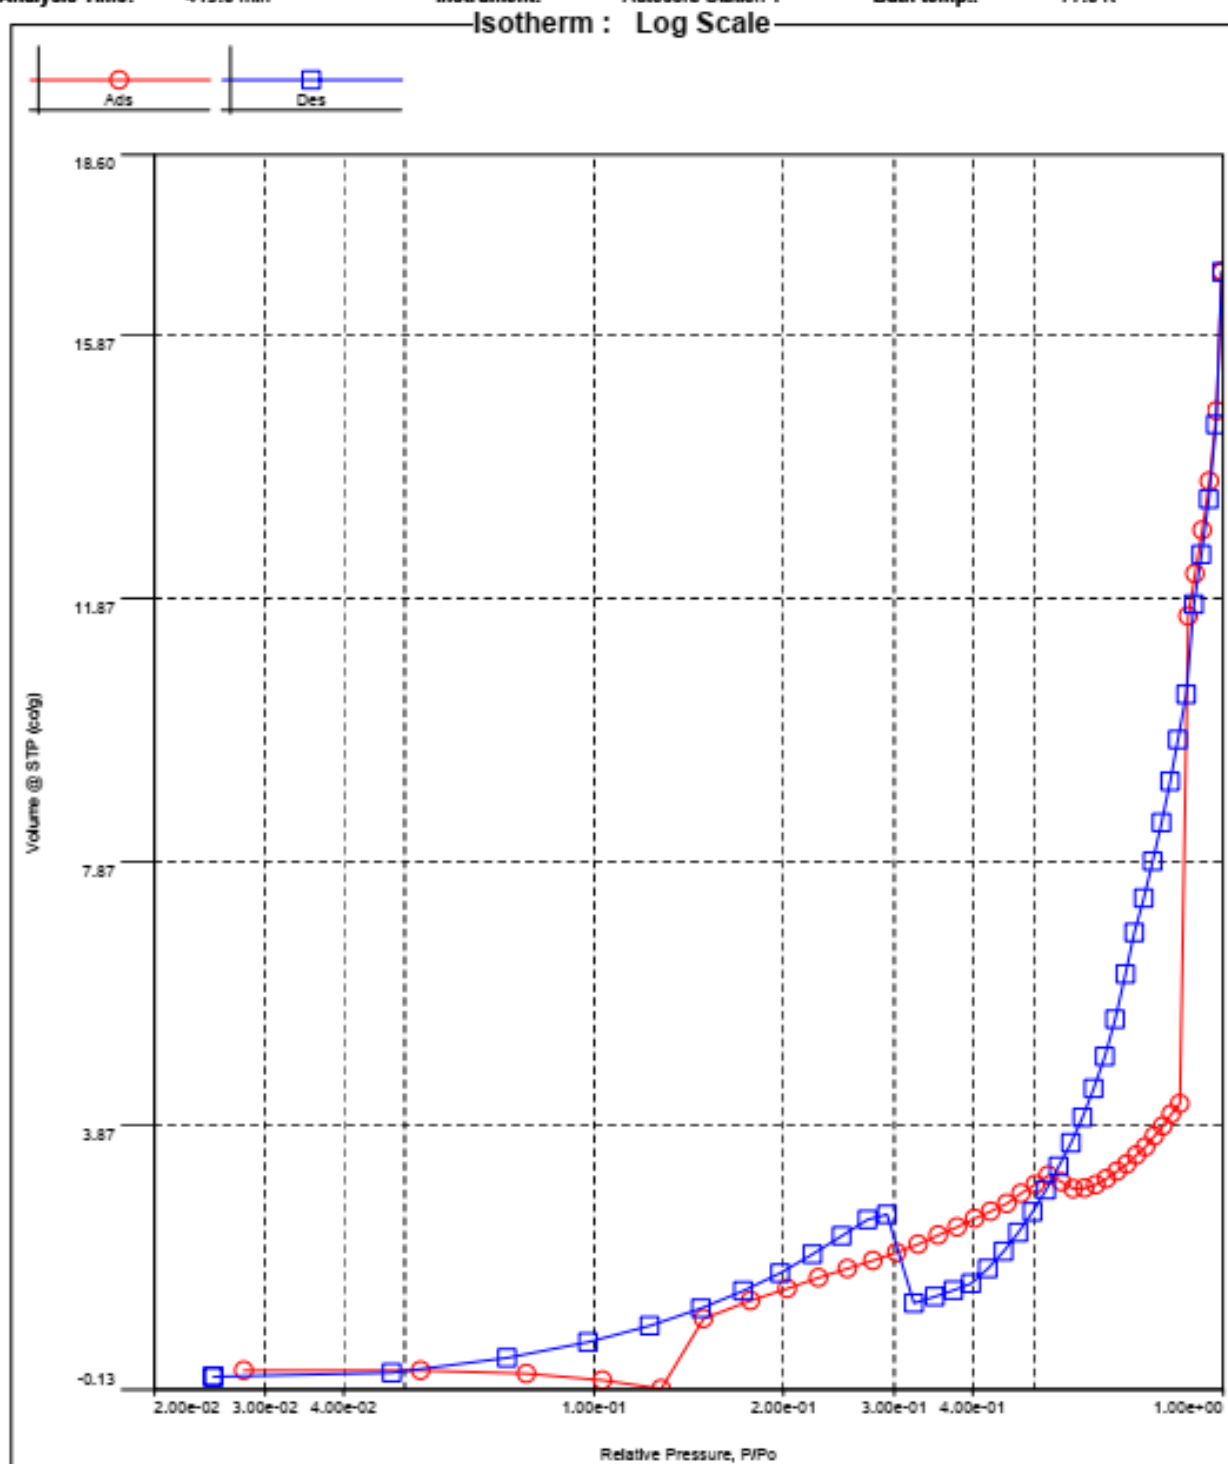

**Figure S6** Isotherm of low temperature nitrogen adsorption SBET (red), desorption (blue) by cryogels: A) CHI-GA0.25%.

| Data Reduction Parameters |                                                                        |                                 |                                     |
|---------------------------|------------------------------------------------------------------------|---------------------------------|-------------------------------------|
| <u>t-Method</u>           | Thermal Transpiration: on                                              | Eff. mol. diameter (D): 4.00 Å  | Eff. cell stem diam. (d): 1.0000 mm |
| <u>BJH/DH method</u>      | Calc. method: de Boer                                                  |                                 |                                     |
| <u>DFT method</u>         | Moving pt. avg.: off                                                   | Ignoring P-tags below 0.35 P/Po |                                     |
|                           | Calc. Model: N2 at 77 K on carbon (slit pore, NLDFT equilibrium model) |                                 |                                     |
| <u>Adsorbate</u>          | Rel. press. range: 0.0000 - 1.0000                                     |                                 | Moving pt. avg: off                 |
|                           | Nitrogen                                                               | Temperature: 77.350K            |                                     |
|                           | Molec. Wt.: 28.013                                                     | Cross Section: 16.200 Å²        | Liquid Density: 0.808 g/cc          |

| MBET summary                 |            |
|------------------------------|------------|
| Slope =                      | 391.696    |
| Intercept =                  | 5.942e+01  |
| Correlation coefficient, r = | 0.999775   |
| C constant =                 | 7.592      |
| Surface Area =               | 7.720 m²/g |

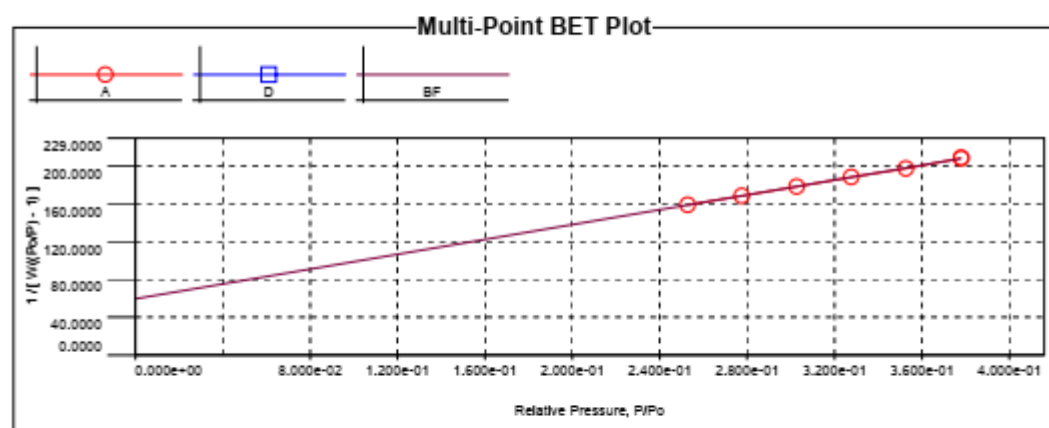

| Multi-Point BET             |                        |                       |                             |                        |                       |
|-----------------------------|------------------------|-----------------------|-----------------------------|------------------------|-----------------------|
| Relative Pressure<br>[P/Po] | Volume @ STP<br>[cc/g] | 1 / [ W((Po/P) - 1) ] | Relative Pressure<br>[P/Po] | Volume @ STP<br>[cc/g] | 1 / [ W((Po/P) - 1) ] |
| 2.52806e-01                 | 1.7076                 | 1.5853e+02            | 3.27711e-01                 | 2.0756                 | 1.8790e+02            |
| 2.77659e-01                 | 1.8289                 | 1.6817e+02            | 3.52633e-01                 | 2.2142                 | 1.9684e+02            |
| 3.02688e-01                 | 1.9513                 | 1.7799e+02            | 3.77971e-01                 | 2.3379                 | 2.0795e+02            |

**Figure S7** Low temperature nitrogen adsorption data using BJH method CHI–GA0.25%.

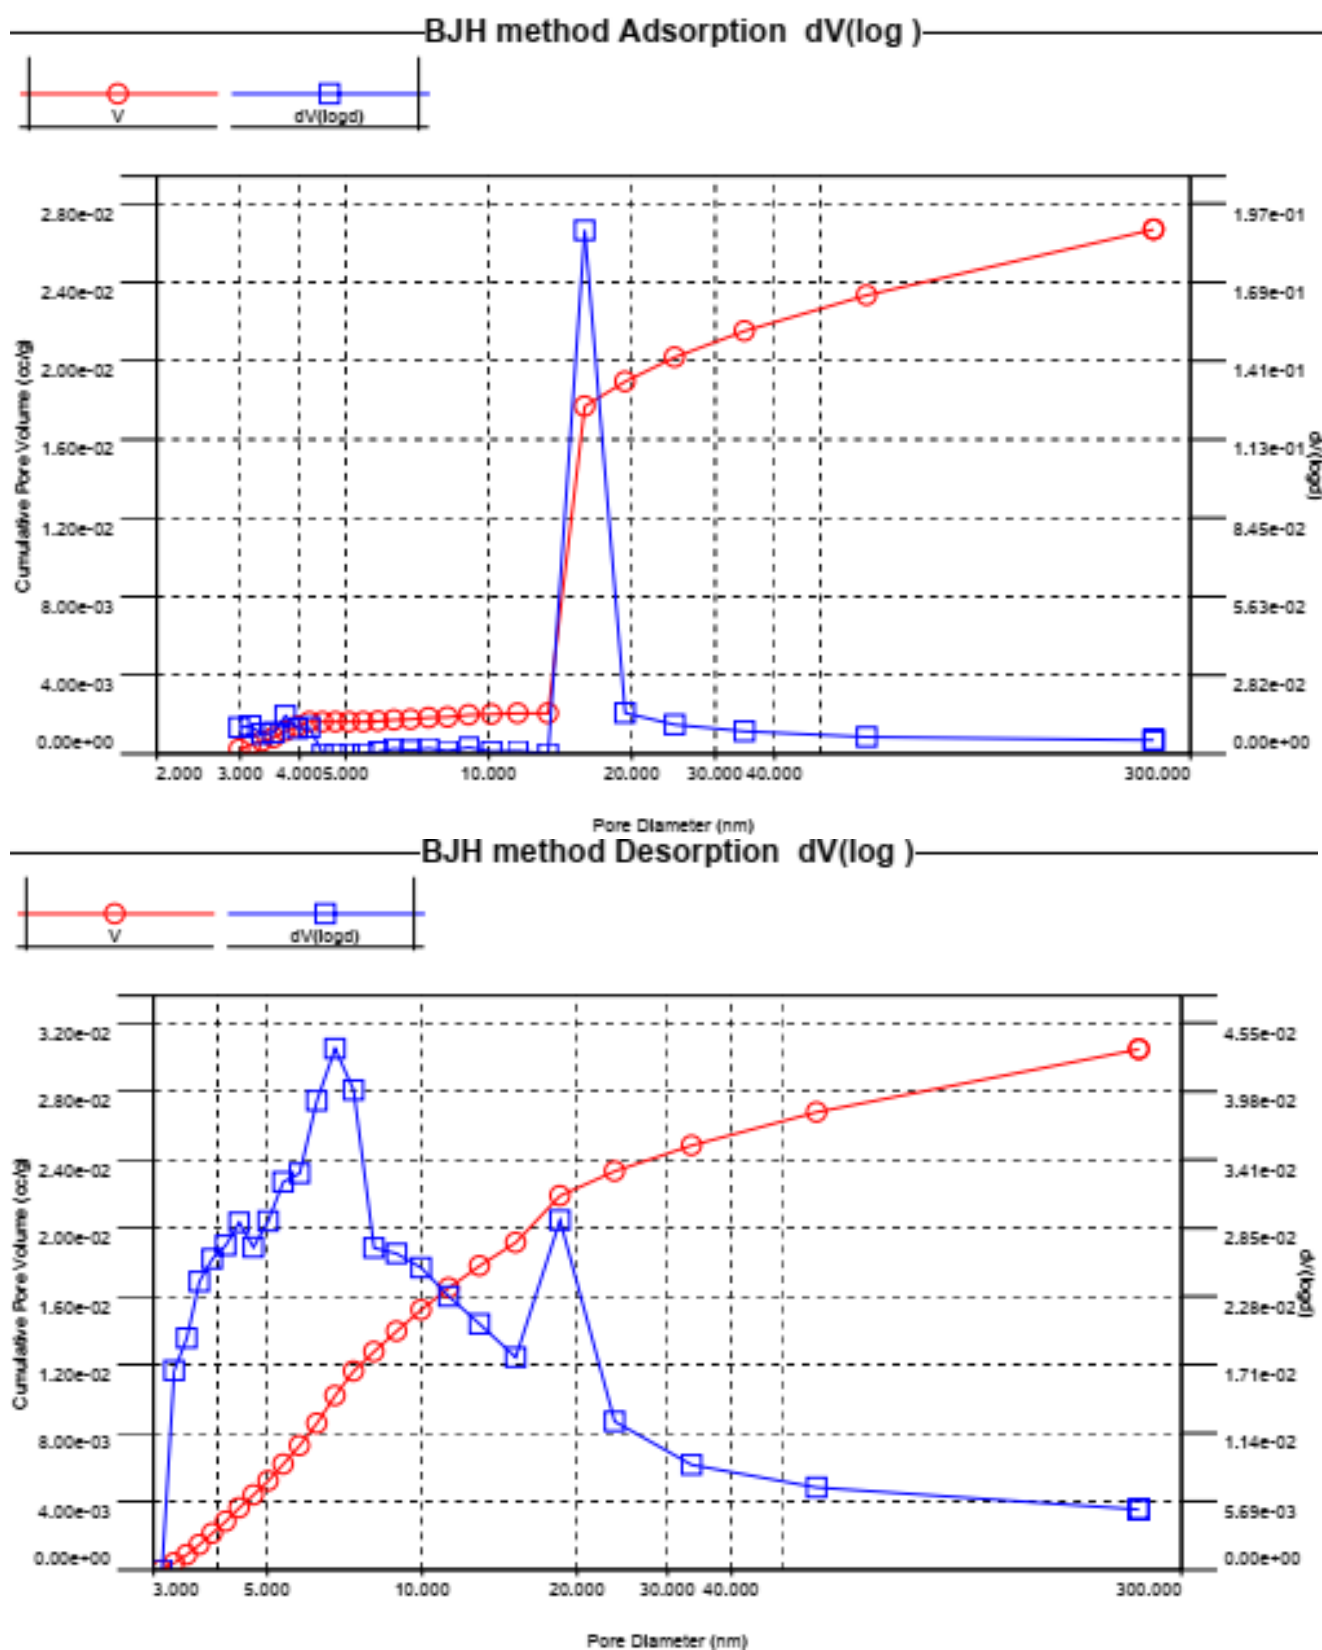

**Figure S8** Low temperature nitrogen adsorption data using BJH method CHI-GA0.25%.

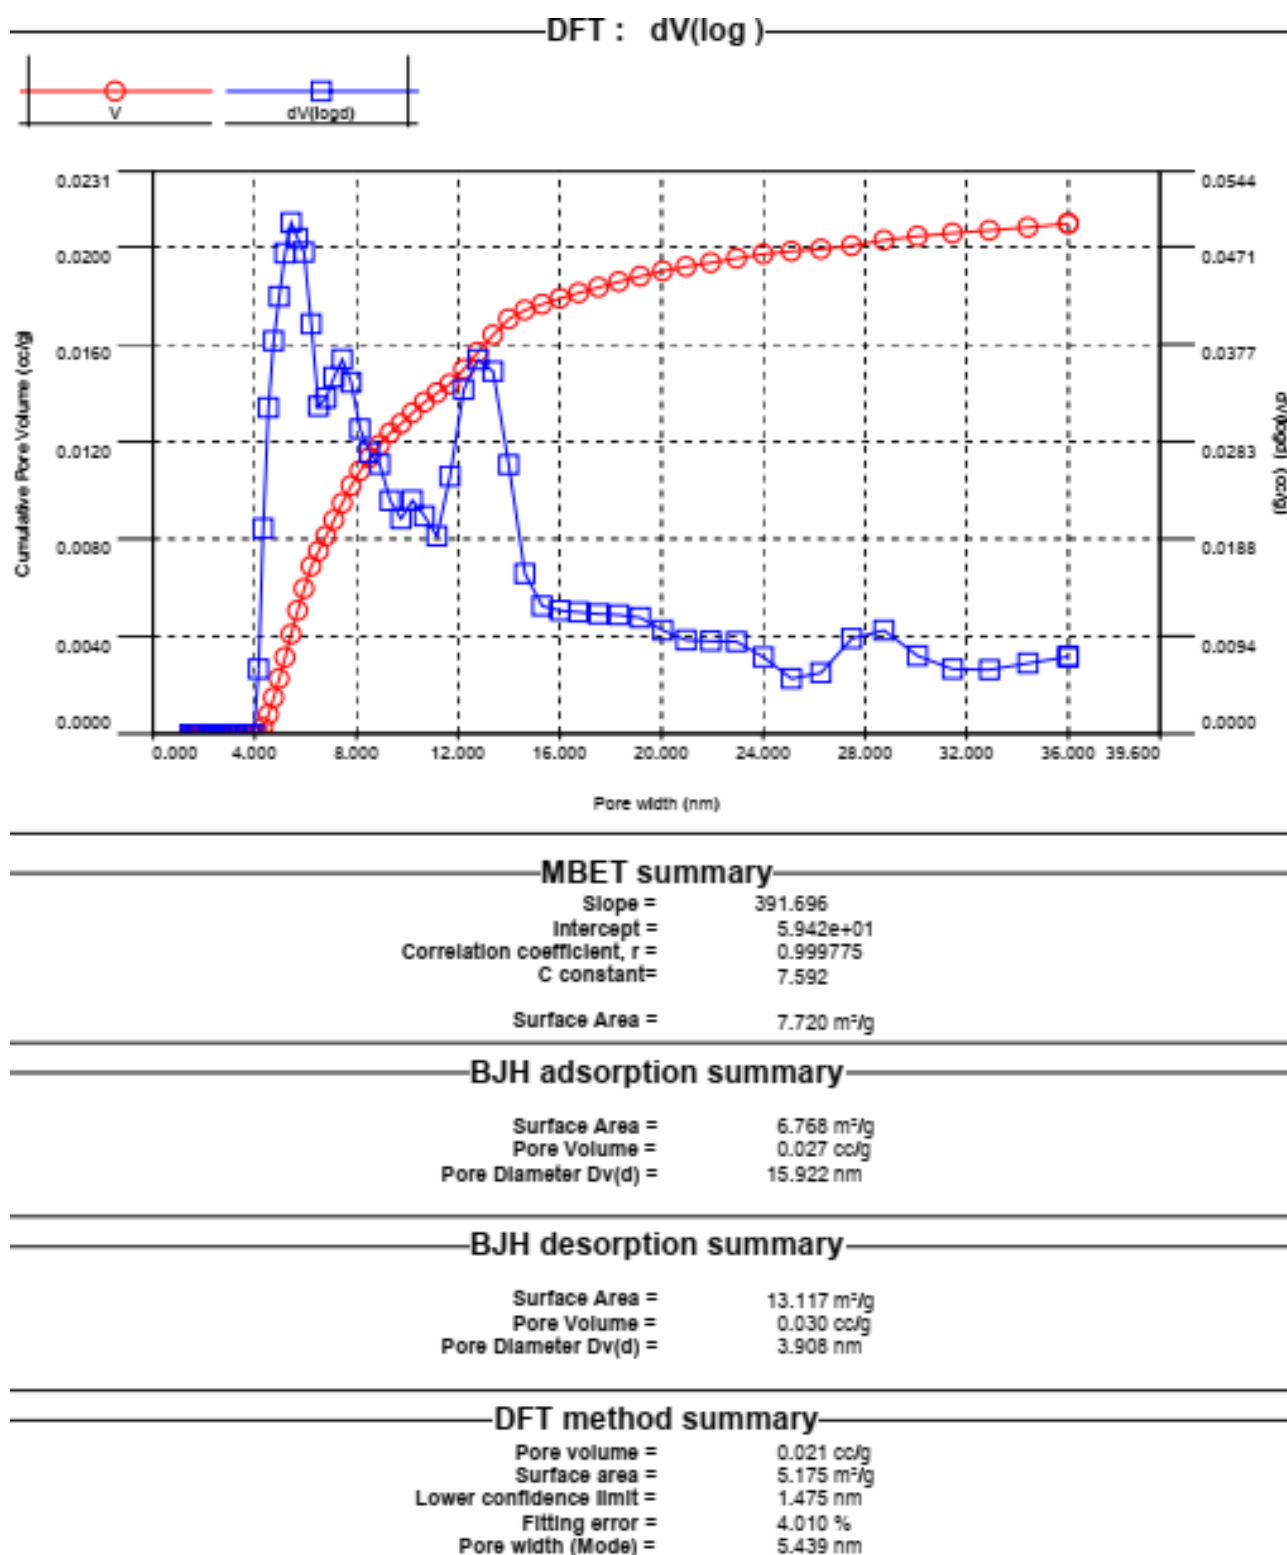

**Figure S 9** Low temperature nitrogen adsorption data using DFT method CHI-GA 0.25%.

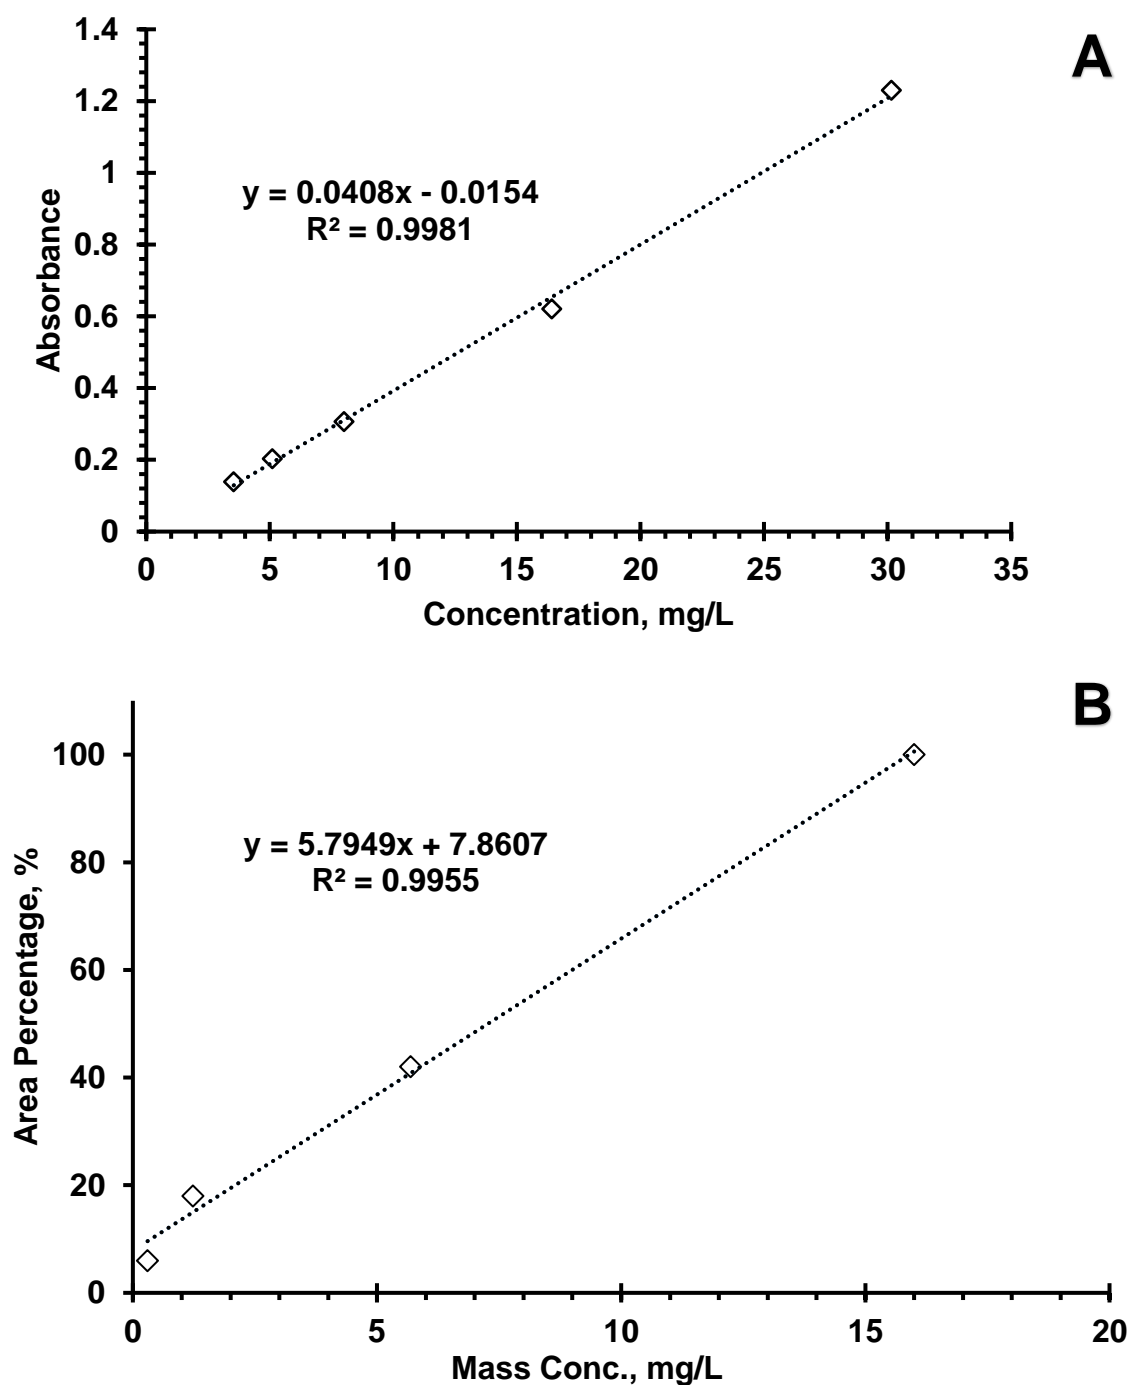

**Figure S 10** Calibration curve of: **A)** OD<sub>420</sub> vs concentration of AgNPs stabilized by *Calendula* extract, concentration confirmed using AAS; **B)** breakthrough area vs concentration of AgNPs stabilized by *Calendula* extract.

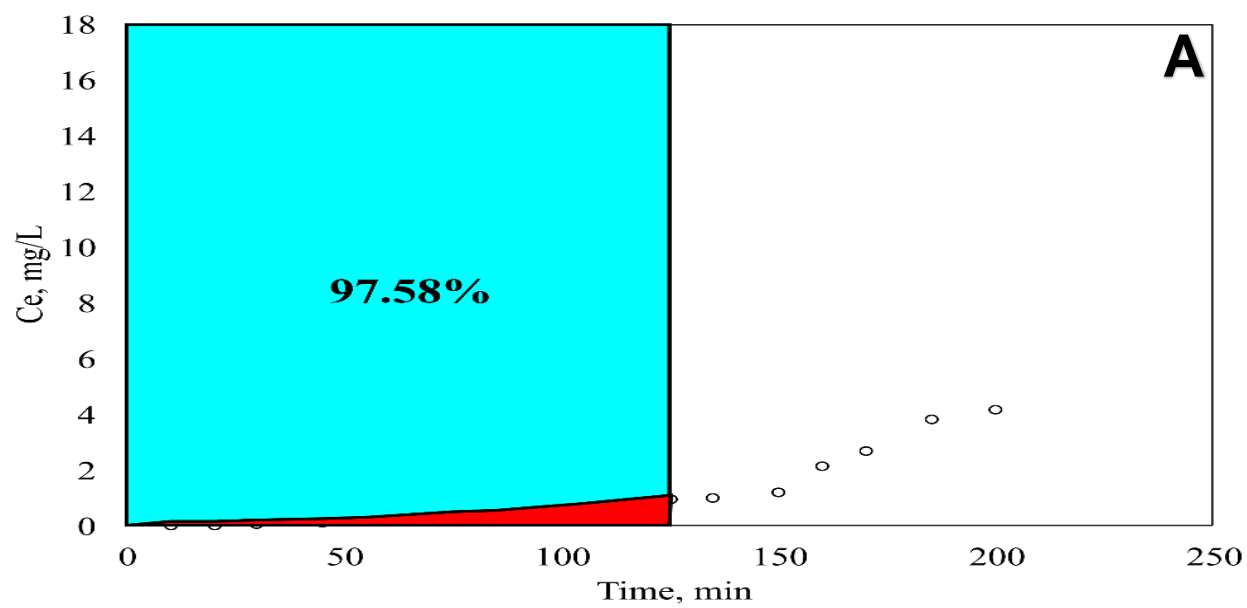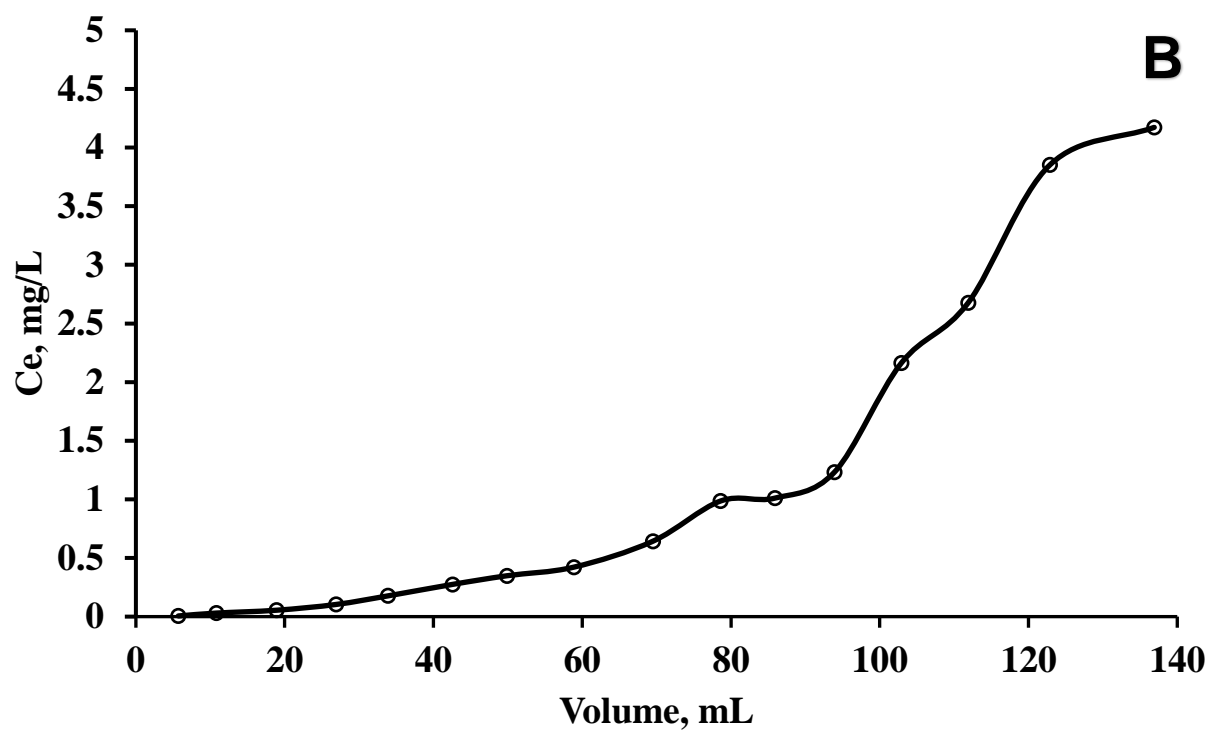

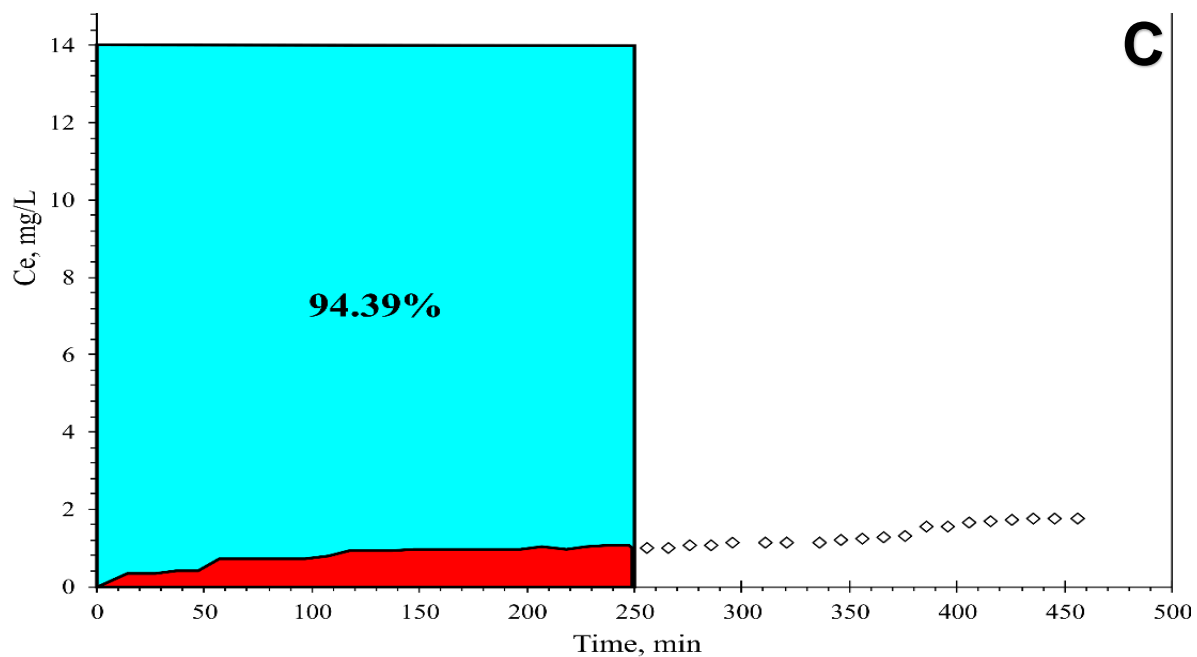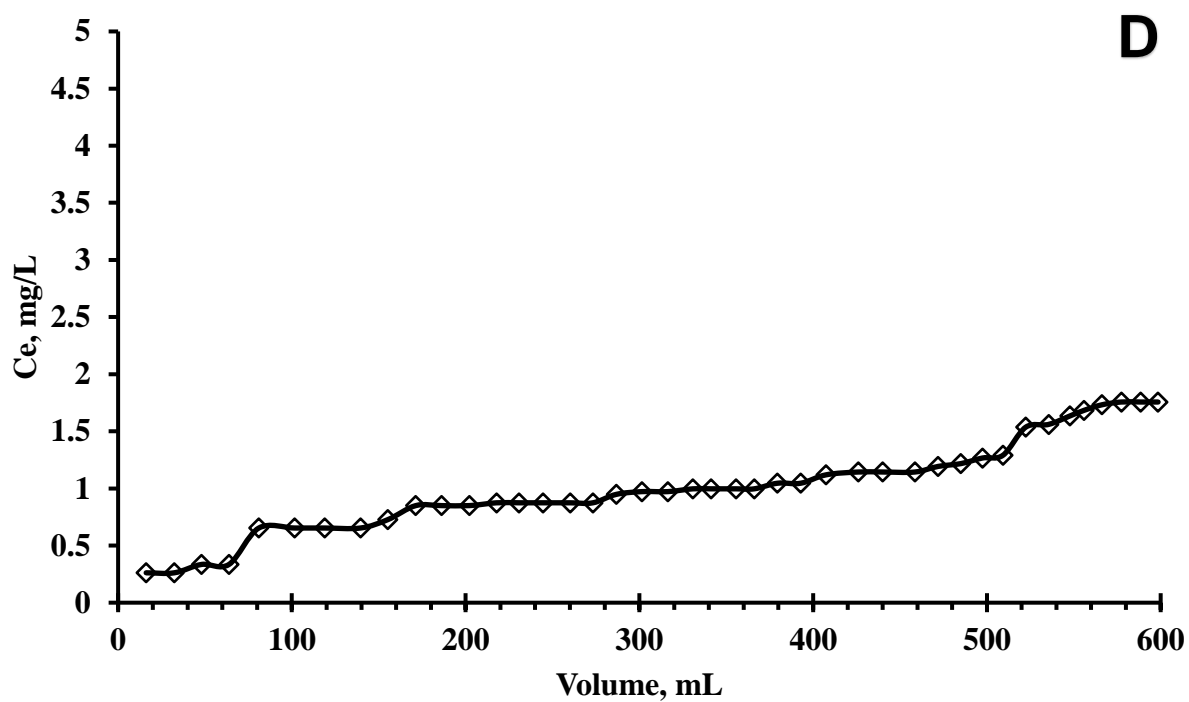

**Figure S11.** Dynamic adsorption breakthrough curve for CHI-GA cryogel AgNPs SPR absorption peak at 420 nm and a flow rate of 0.8 mL/min: A and B) 18mg/L AgNPs stock solution; C and D) 14 mg/L AgNPs stock solution.

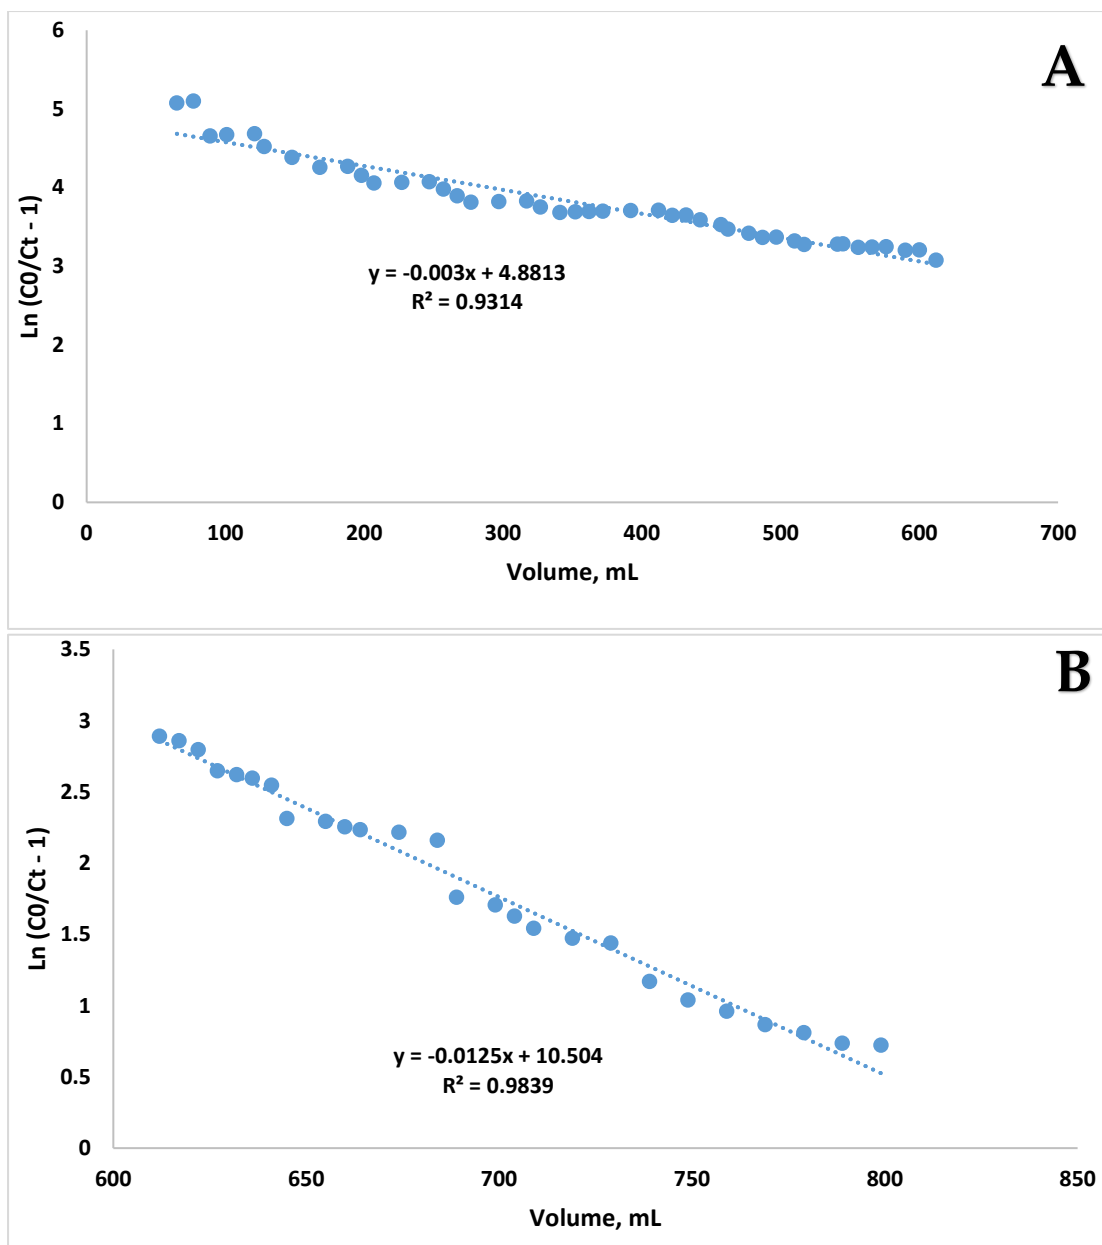

**Figure S12** Thomas model fitting before and after breakthrough

**Table S1.** Variables in calculating the adsorption capacity

| Variable            | Value                                                        | Units          |
|---------------------|--------------------------------------------------------------|----------------|
| Inlet concentration | 14                                                           | mg/L           |
| Kth (Thomas const)  | 0.000378227                                                  | = Slope/ $C_0$ |
| Slope               | 0.003                                                        | absolute value |
| Intercept           | 4.8813                                                       |                |
| Thomas Equation     | $y = (K_{th} \cdot Q_0 \cdot m/Q) - (K_T \cdot C_0 \cdot t)$ |                |
| Q (flowrate)        | 0.8                                                          | mL/min         |

|               |     |      |
|---------------|-----|------|
| Qo (capacity) | 132 | mg/g |
|---------------|-----|------|

**Reference:**

1. Zhangabay, Z., & Berillo, D.. Antimicrobial and antioxidant activity of AgNPs stabilized with Calendula officinalis flower extract. *Results in Surfaces and Interfaces*, 2023, 100109.  
<https://doi.org/10.1016/j.rsurfi.2023.100109>
